# Supplementary material for: Comparison of assembly algorithms for improving rate of metatranscriptomic functional annotation
Source: PubMed Central journal article supplement (PMC4236897; doi:10.1186/2049-2618-2-39), 2014-10-28

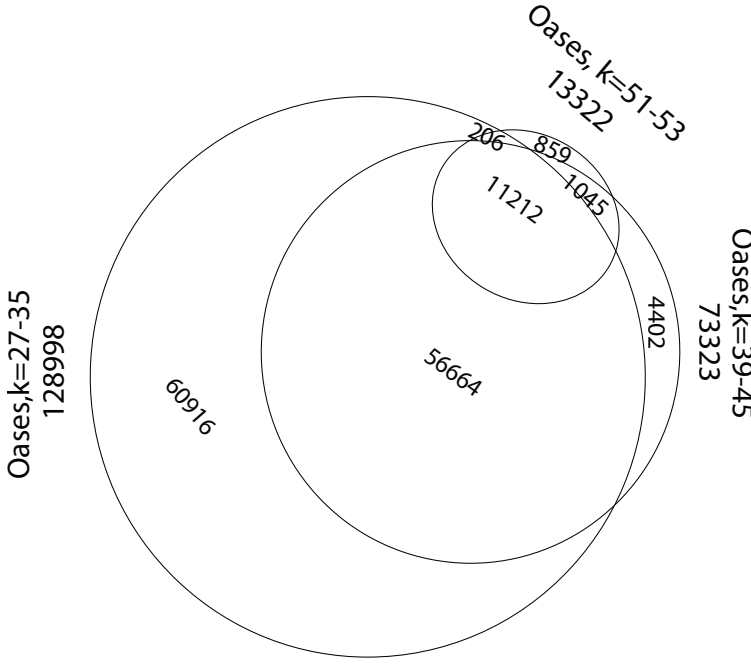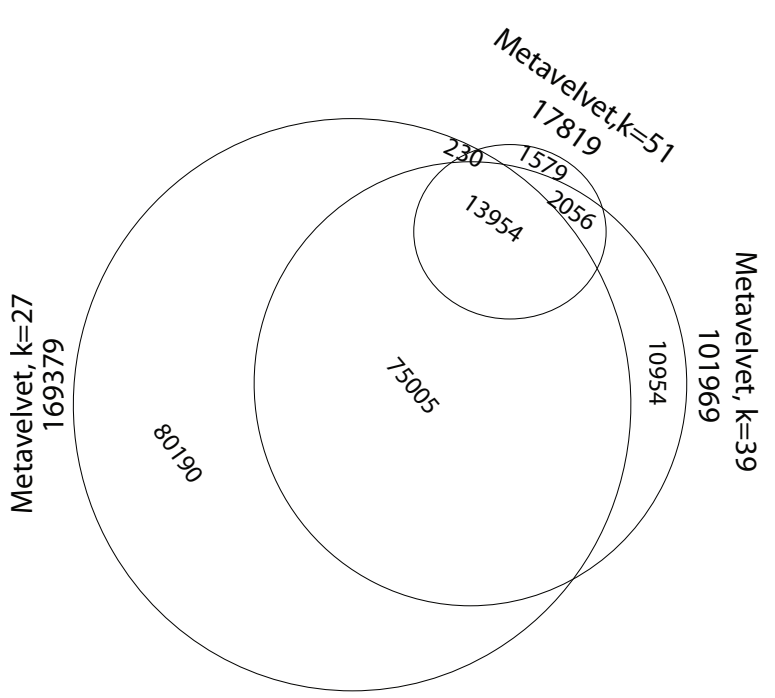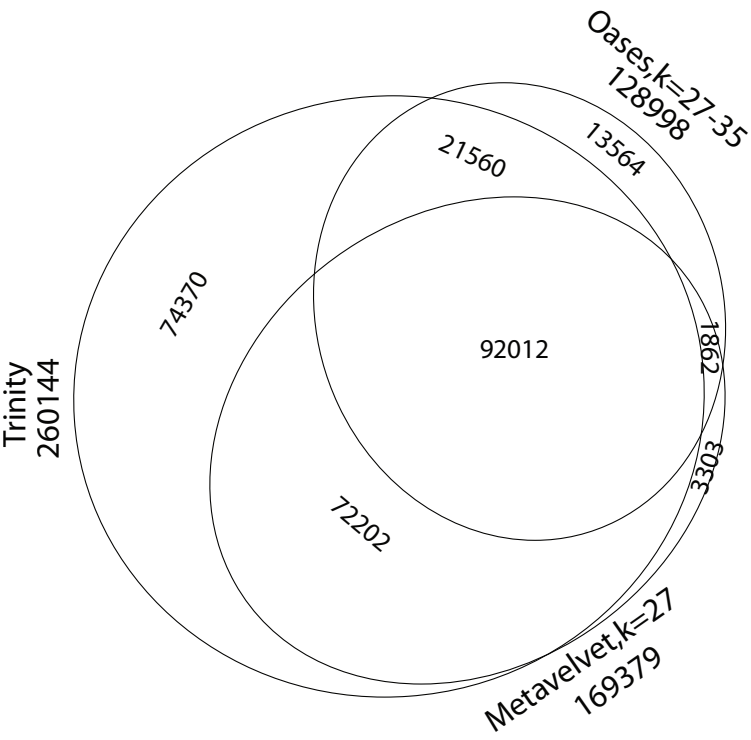

Supplement: 2049-2618-2-39-S3.pdf [file 2049-2618-2-39-S3.pdf]
